# Supplementary material for: Preparation and characterization of stereocomplex aggregates based on PLA–P188–PLA
Source: Royal Society of Chemistry journal article supplement (doi:10.1039/c6ra04537e), 2016-01-01
Supplement: c6ra04537e1.pdf [file c6ra04537e1.pdf]

## **Preparation and characterization of stereocomplex aggregates based on PLA- P188-PLA**

**Weiwei Zhang, Delong Zhang, Xiaoshan Fan, Guangyue Bai\*, Yuqin Jiang and Zhiguo  
Hu\***

*Henan Engineering Laboratory of Chemical Pharmaceuticals & Biomedical Materials, Collaborative  
Innovation Center of Henan Province for Green Manufacturing of Fine Chemicals, Key Laboratory of Green  
Chemical Media and Reactions, Ministry of Education, School of Chemistry and Chemical Engineering,  
Henan Normal University, Xinxiang, P. R. China.*

*E-mails: Zhiguo Hu (E-mail: zghu@htu.cn, Tel: +86-373-3326335);*

*Guangyue Bai (E-mail: baiguangyue@htu.cn, Tel: +86-373-3328622).*

### **Table of contents**

|                                                                                |           |
|--------------------------------------------------------------------------------|-----------|
| <b>I. <sup>1</sup>H NMR Spectra of 2, 3, 4, 5a, 5b, 6a, 6b, 7a and 7b.....</b> | <b>S2</b> |
| <b>II. Fluorescence spectra for the stereocomplexes.....</b>                   | <b>S6</b> |
| <b>III. DLS spectra for the stereocomplexes.....</b>                           | <b>S7</b> |
| <b>IV. DSC heating curves.....</b>                                             | <b>S7</b> |

I. <sup>1</sup>H NMR Spectra of 2, 3, 4, 5a, 5b, 6a, 6b, 7a and 7b

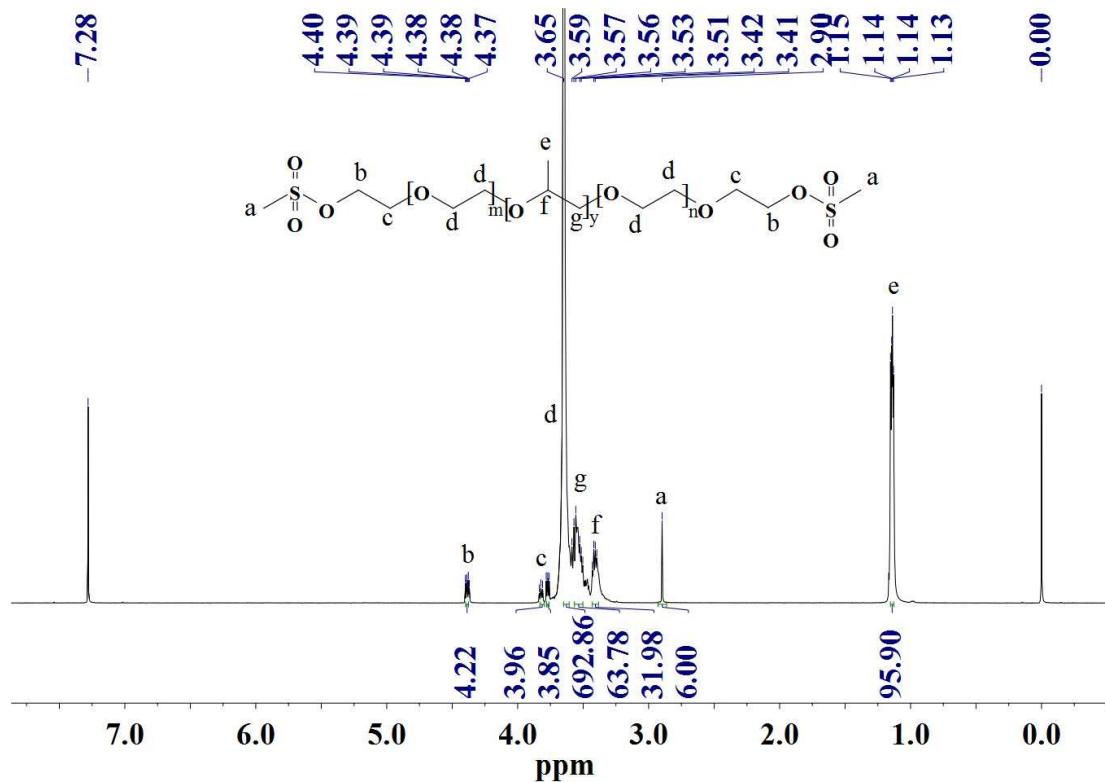

SI Fig. 1. <sup>1</sup>H NMR Spectrum of Ms-P188-Ms 2

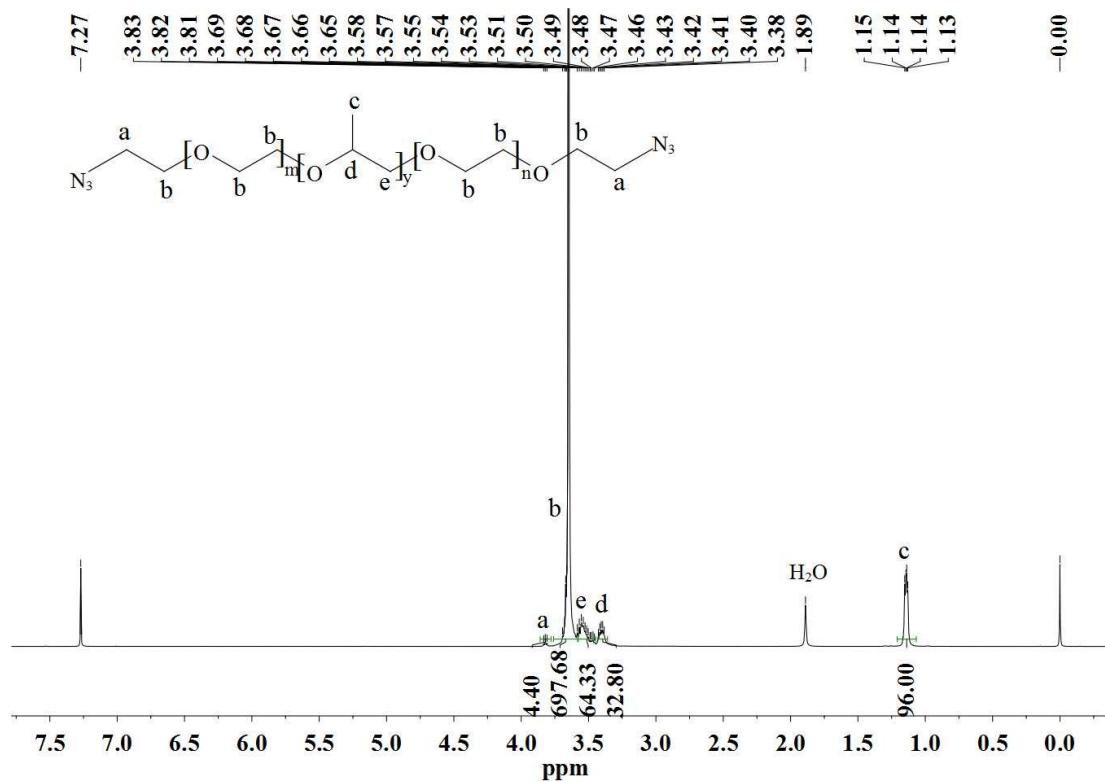

SI Fig. 2. <sup>1</sup>H NMR Spectrum of N<sub>3</sub>-P188-N<sub>3</sub> 3

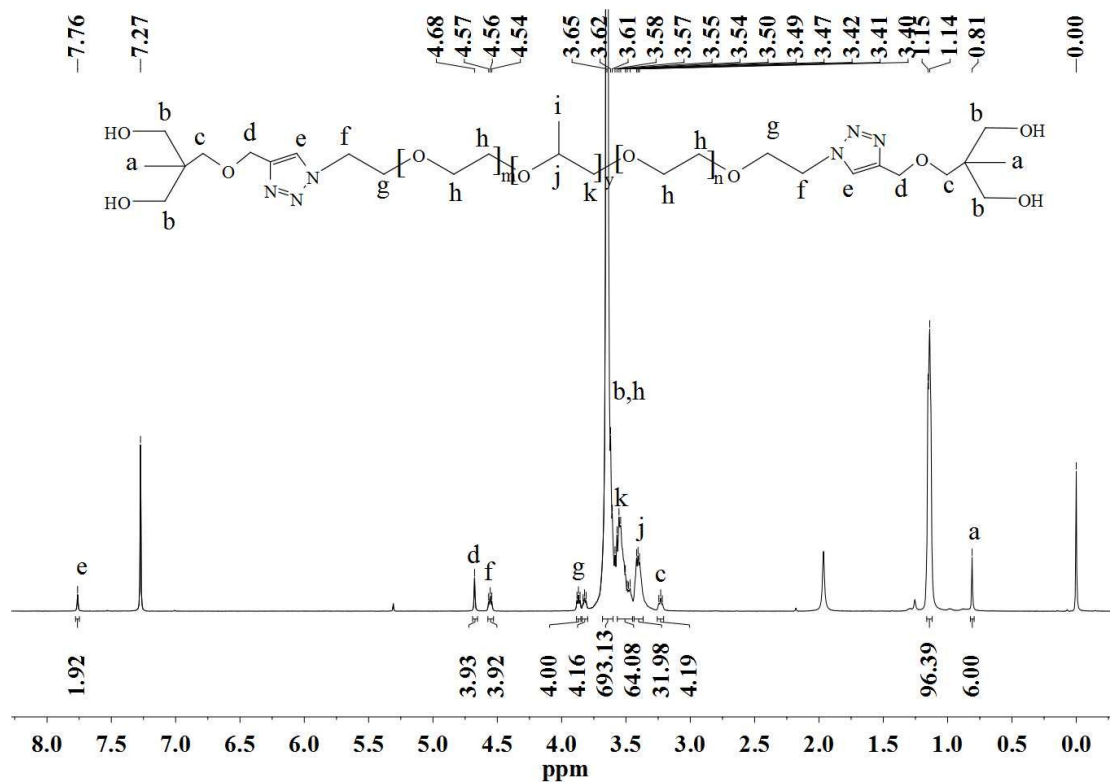

SI Fig. 3.  $^1\text{H}$  NMR Spectrum of G1-P188-G1 4

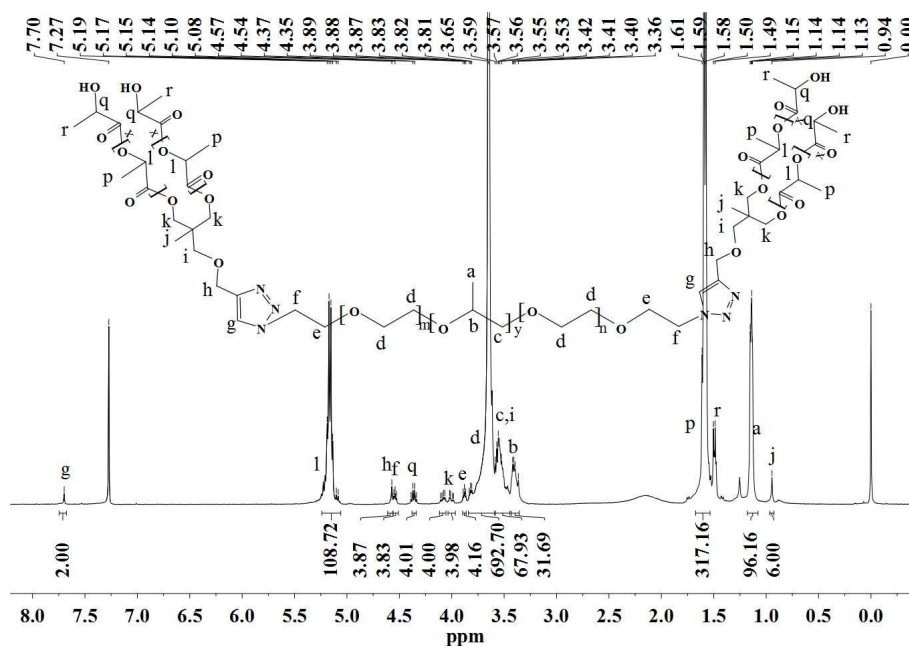

SI Fig. 4.  $^1\text{H}$  NMR Spectrum of (PLLA)<sub>2</sub>-G1-P188-G1-(PLLA)<sub>2</sub> 5a

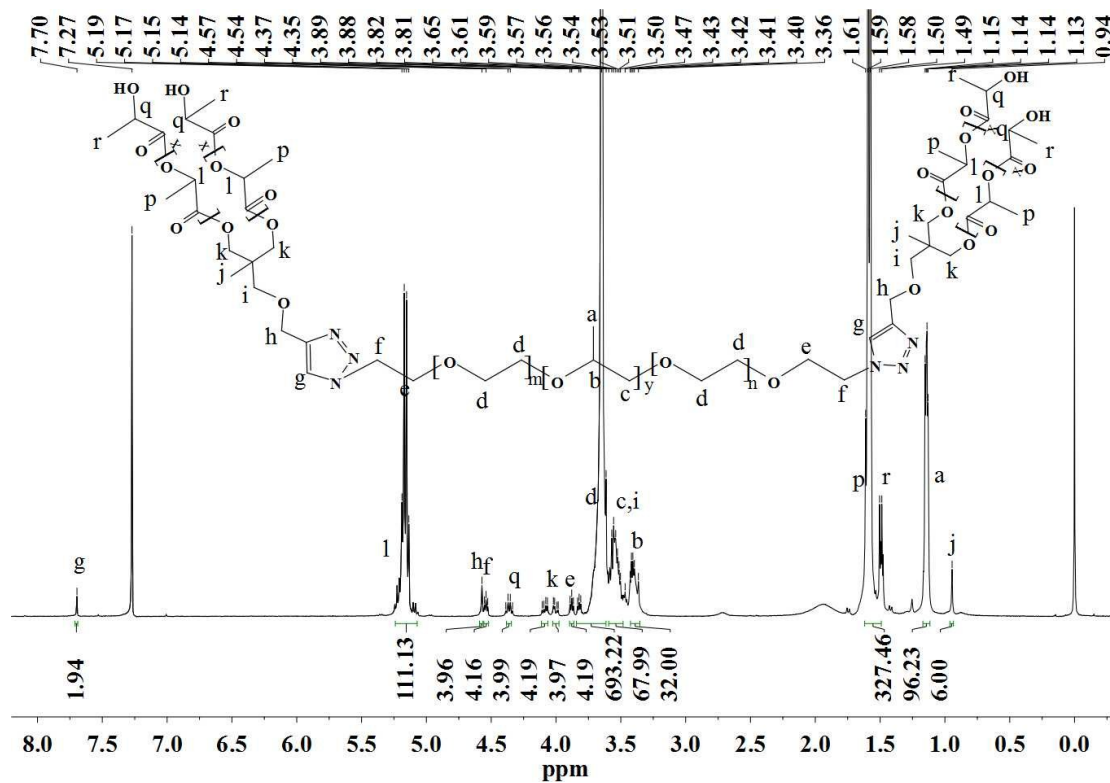

SI Fig. 5.  $^1H$  NMR Spectrum of  $(PDLA)_2-G1-P188-G1-(PDLA)_2$  **5b**

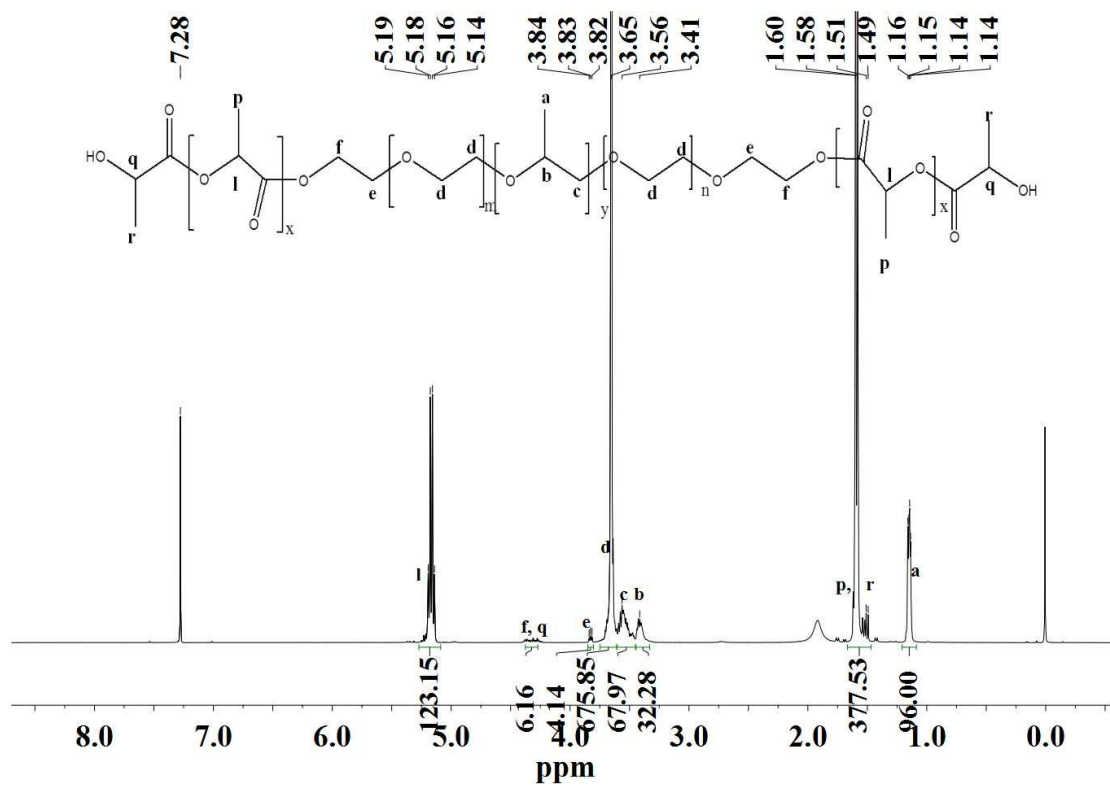

SI Fig. 6.  $^1H$  NMR Spectrum of PLLA-P188-PLLA **6a**

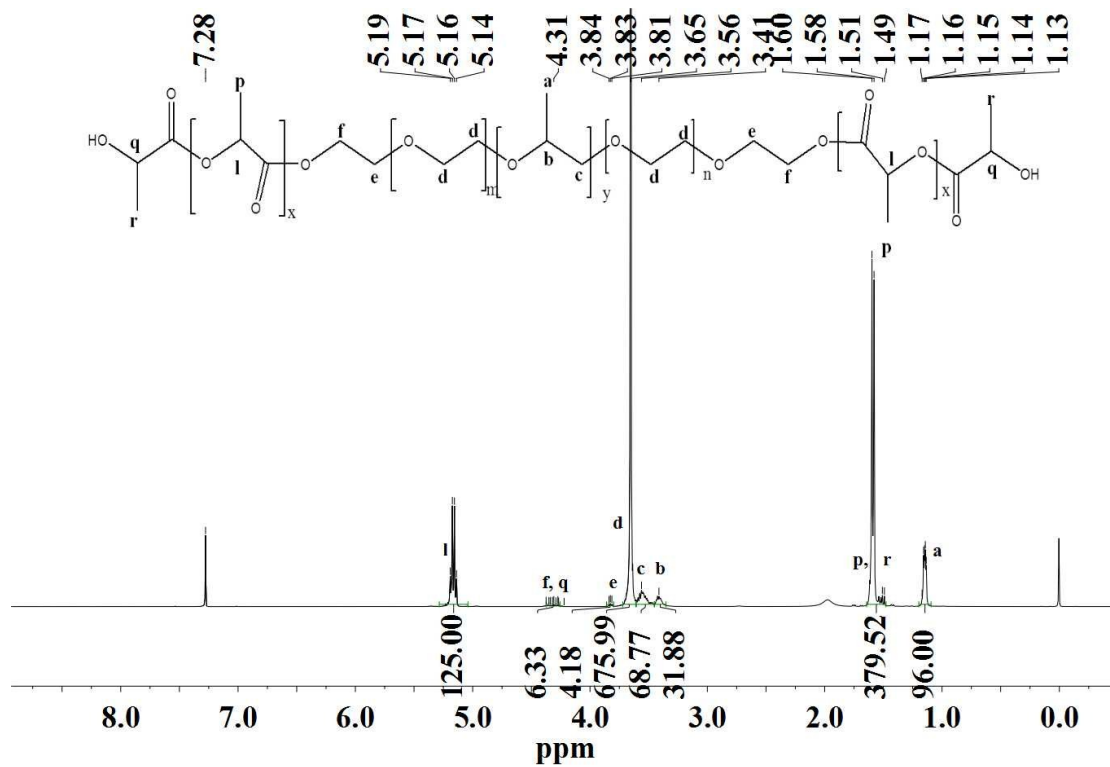

SI Fig. 7.  $^1\text{H}$  NMR Spectrum of PDLA-P188-PDLA 6b

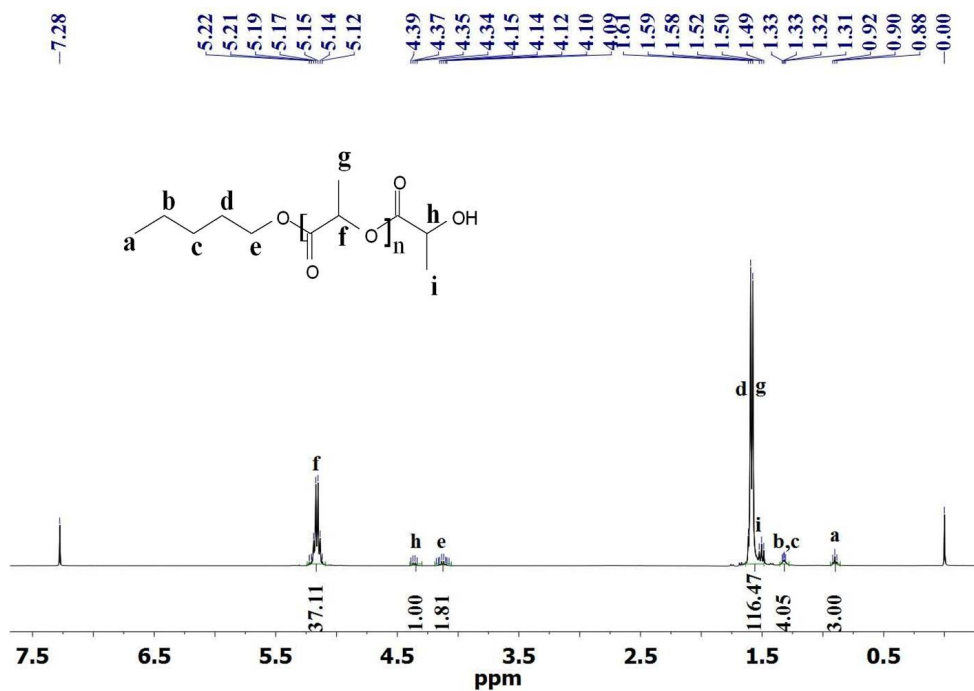

SI Fig. 8.  $^1\text{H}$  NMR Spectrum of PLLA 7a

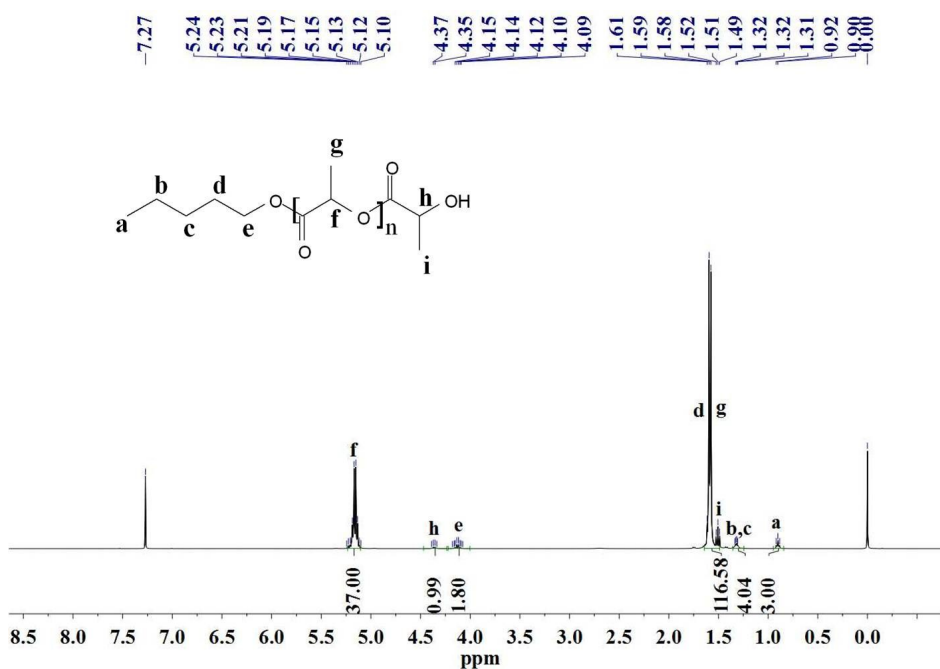

SI Fig. 9. <sup>1</sup>H NMR Spectrum of PDLA 7b

## II. Fluorescence spectra for the stereocomplexes

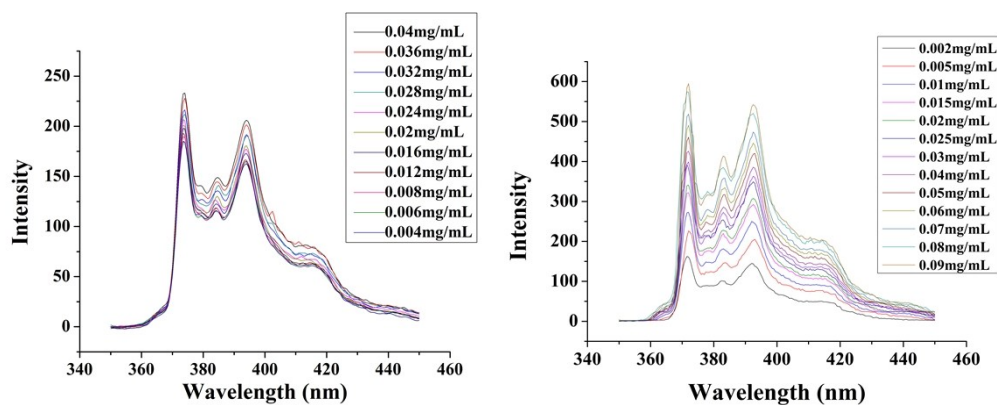

SI Fig. 10. Steady-state fluorescence excitation spectra monitored at for the pyrene probe in an aqueous solution of (scPLA)<sub>2</sub>-G1-P188-G1-(scPLA)<sub>2</sub> (left) and scPLA-P188-scPLA (right) at various concentration at 25 °C.

### III. DLS spectra for the stereocomplexes

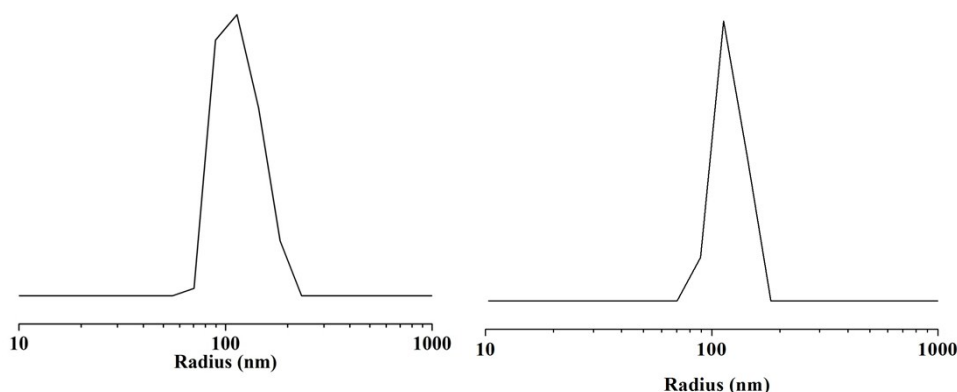

SI Fig. 11. Size distribution of the self-assembled aggregates determined by DLS: (scPLA)<sub>2</sub>-G1-P188-G1-(scPLA)<sub>2</sub> (left) and scPLA-P188-scPLA (right).

### IV. DSC Heating Curves

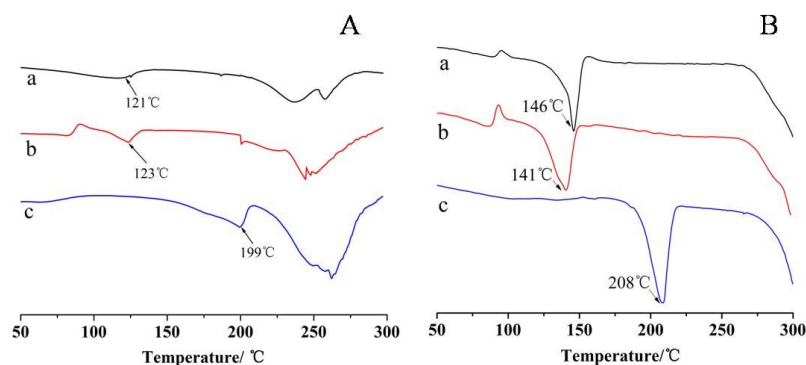

SI Fig 12. DSC curves of A: a) (PLLA)<sub>2</sub>-G1-P188-G1-(PLLA)<sub>2</sub>, b) (PDLA)<sub>2</sub>-G1-P188-G1-(PDLA)<sub>2</sub>, c) (scPLA)<sub>2</sub>-G1-P188-G1-(scPLA)<sub>2</sub>; B: a) PLLA-P188-PLLA, b) PDLA-P188-PDLA, c) scPLA-P188-scPLA.

The crystallinity of the stereocomplex ( $X_{sc}$ ) was calculated as <sup>1,2</sup>:

$$X_{sc} \% = \frac{\Delta H_{sc}}{p \cdot 142 J/g} \times 100 \% \quad (1)$$

The  $X_{sc}$  is the value of the polylactide stereocomplex crystallites calculated from the above equation (1). The  $\Delta H_{sc}$  (fusion enthalpy) is determined from DSC measurement. The  $p$  is the polylactide percent (wt %, including PLLA and PDLA) in the stereocomplexes, and the 142 J/g is a constant from the reported fusion enthalpy value with 100 % crystallinity for stereocomplex.

Thus the obtained  $\Delta H_{sc}$  values from DSC curves are 30.68 J/g for (scPLA)<sub>2</sub>-G1-P188-G1-(scPLA)<sub>2</sub> and 50.48 J/g for scPLA-P188-scPLA. The  $p$  values are 0.44 for (scPLA)<sub>2</sub>-G1-P188-G1-(scPLA)<sub>2</sub> and 0.46 for scPLA-P188-scPLA. Therefore, the calculated crystallinity  $X_{sc}$  is 49 % for (scPLA)<sub>2</sub>-G1-P188-G1-(scPLA)<sub>2</sub> and 78 % for scPLA-P188-scPLA.

(1) Liu, Y.; Shao, J.; Sun, J.; Bian, X.; Feng, L.; Xiang, S.; Sun, B.; Chen, Z.; Li, G.; Chen, X. *Polym. Degrad. Stab.* **2014**, *101*, 10-17.

(2) Baimark, Y.; Srihanam, P. *Polym. Test.* **2015**, *45*, 52-57.
